# Supplementary material for: Characterization of intrinsic and effective fitness changes caused by temporarily fixed mutations in the SARS-CoV-2 spike E484 epitope and identification of an epistatic precondition for the evolution of E484A in variant Omicron
Source: Virol J. 2023 Nov 8;20:257. doi: 10.1186/s12985-023-02154-4 (PMC10633978; doi:10.1186/s12985-023-02154-4)
Supplement: Supplementary file 1 — Supplementary Material 1 [file 12985_2023_2154_MOESM1_ESM.pdf]

## **Supplementary data to**

### **Characterization of intrinsic and effective fitness changes caused by temporarily fixed mutations in the SARS-CoV-2 spike E484 epitope and identification of an epistatic precondition for the evolution of E484A in variant Omicron**

#### **Authors:**

Simon Schroeder<sup>1</sup>, Anja Richter<sup>1</sup>, Talitha Veith<sup>1</sup>, Jackson Emanuel<sup>1</sup>, Luca Gudermann<sup>1</sup>, Kirstin Friedmann<sup>1</sup>, Lara M. Jeworowski<sup>1</sup>, Barbara Mühlemann<sup>1</sup>, Terry C. Jones<sup>1,2</sup>, Marcel A. Müller<sup>1</sup>, Victor M. Corman<sup>1</sup>, Christian Drosten<sup>1,#</sup>

#### **Affiliations:**

<sup>1</sup>Institute of Virology, Charité-Universitätsmedizin Berlin, Berlin, Germany

<sup>2</sup>Centre for Pathogen Evolution, Department of Zoology, University of Cambridge, Downing St., Cambridge, CB2 3EJ, U.K.

#### **#Corresponding author**

e-mail: christian.drosten@charite.de

## Supplementary data

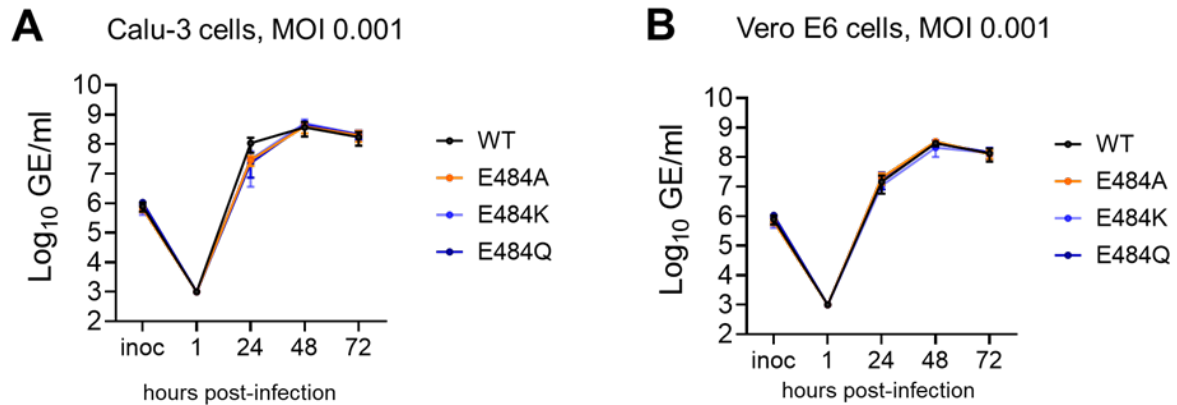

**Figure S1: rSARS-CoV-2 S:E484 mutants display highly similar replication kinetics in Calu-3 and Vero E6 cells.** Multicycle infection (MOI 0.001) in **A**) Calu-3 cells and **B**) Vero E6 cells with the indicated rSARS-CoV-2 mutants were performed. At the indicated hpi, viral RNA was extracted from the culture supernatant and quantified using real-time quantitative PCR (E assay). Shown are the combined data of two independent experiments performed in triplicates (n = 6). MOI = multiplicity of infection; WT = wild type; GE = genome equivalents

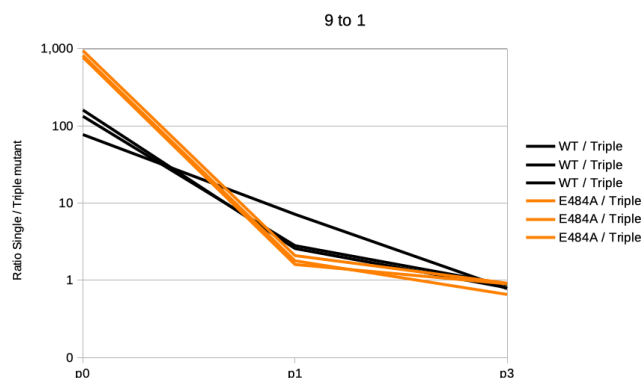

**Figure S2: Comparison of WT and E484A versus triple mutant growth dynamic in competition assay.** Data from the 9:1 (triple-mutant initially in minority) infection of the competition experiment without serum, taken from the rightmost column of Figure 3H and 3I. For each timepoint (p0, p1, p3), the ratio of single mutant (WT or E484A) fraction to triple mutant (E484A, Q498R, N501Y) fraction, was computed. Each line connects the ratios of one biological repeat out of three for each of the two competitions. The steeper decline of the orange lines shows the more rapid reduction over time of the fraction of E484A mutant in the presence of the triple mutant than the reduction of WT (black lines) in the presence of the triple mutant. A normalization (not shown) of these ratios relative to the mean ratio of WT versus triple mutant ratio, indicates the triple mutant out-competing the E484A mutant between 2 and 12 times as quickly as it out-competed WT.

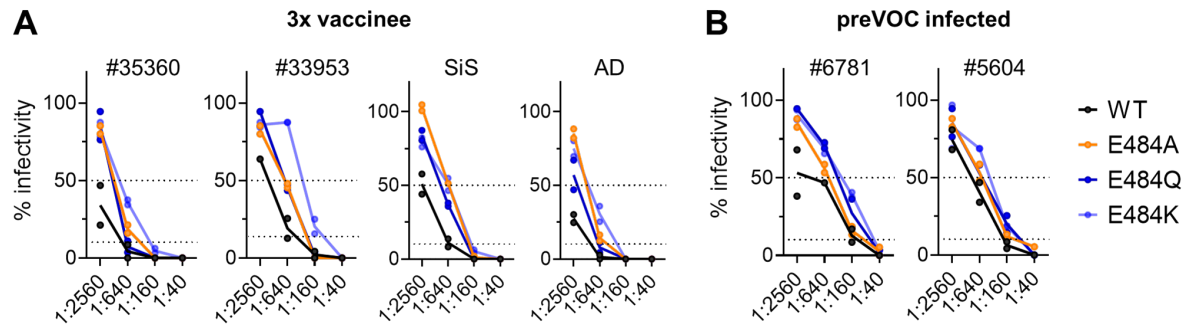

**Figure S3:** 50 PFU of each variant were incubated in duplicates with the indicated serial dilutions of SARS-CoV-2 antisera in culture medium, or culture medium alone (no serum control), for 1 hour prior to infection of Vero E6 cells. At 3 dpi, cells were fixed, stained, and plaques were counted. Shown here is the average reduction of plaques over no serum control, i.e., reduction in infectivity  $\pm$  SD. Dashed lines show 50 and 10% infectivity, respectively. PRNTs were performed with antisera of **A**) triple-vaccinated donors (pre-VOC vaccinated), **B**) pre-VOC infected donors (B.1 infected)

**Table S1:** P-values for Figure 2. Statistical differences in replication (PFU/ml) between groups were analyzed by two-tailed Student t tests (GraphPad Prism v.9.3.1).

| Cell line        | Sample | Comparison  | P-value    |
|------------------|--------|-------------|------------|
| Calu-3 (Fig 2A)  | 24 hpi | WT vs 484A  | ns; 0.4777 |
|                  |        | WT vs 484Q  | ns; 0.3828 |
|                  |        | WT vs. 484K | ns; 0.6472 |
|                  | 48 hpi | WT vs 484A  | ns; 0.1871 |
|                  |        | WT vs 484Q  | ns; 0.0578 |
|                  |        | WT vs. 484K | ns; 0.1296 |
|                  | 72 hpi | WT vs 484A  | ns; 0.1283 |
|                  |        | WT vs 484Q  | ns; 0.0625 |
|                  |        | WT vs. 484K | ns; 0.2802 |
| Vero E6 (Fig 2B) | 24 hpi | WT vs 484A  | ns; 0.0515 |
|                  |        | WT vs 484Q  | ns; 0.0728 |
|                  |        | WT vs. 484K | ns; 0.0533 |
|                  | 48 hpi | WT vs 484A  | ns; 0.2283 |
|                  |        | WT vs 484Q  | ns; 0.0539 |
|                  |        | WT vs. 484K | *; 0.0392  |
|                  | 72 hpi | WT vs 484A  | ns; 0.0774 |
|                  |        | WT vs 484Q  | ns; 0.4432 |
|                  |        | WT vs. 484K | ns; 0.0921 |
| H1299 (Fig 2C)   | 24 hpi | WT vs 484A  | ns; 0.9563 |
|                  |        | WT vs 484Q  | ns; 0.4050 |
|                  |        | WT vs. 484K | ns; 0.7466 |
|                  | 48 hpi | WT vs 484A  | *; 0.0330  |
|                  |        | WT vs 484Q  | *; 0.0492  |
|                  |        | WT vs. 484K | ns; 0.0929 |
|                  | 72 hpi | WT vs 484A  | ns; 0.0913 |
|                  |        | WT vs 484Q  | ns; 0.1866 |
|                  |        | WT vs. 484K | *; 0.0243  |

**Table S2: Information on sera used**

| Serum | Category         | Date of infection or vaccination | Date of sample collection | collection post infection or vaccination (days) | cPass WT |
|-------|------------------|----------------------------------|---------------------------|-------------------------------------------------|----------|
| 35360 | 3x vaccinee      | 30.11.2021                       | 04.01.2022                | 35                                              | 95.71    |
| 33953 | 3x vaccinee      | 24.10.2021                       | 23.11.2021                | 30                                              | 95.81    |
| SiS   | 3x vaccinee      | 02.12.2021                       | 02.03.2022                | 90                                              | 96.18    |
| AD    | 3x vaccinee      | 03.01.2021                       | 02.03.2022                | 59                                              | 96.15    |
| 6781  | preVOC infection | 17.03.2020                       | 07.07.2020                | 112                                             | 93.20    |
| 5604  | preVOC infection | 09.03.2020                       | 06.05.2020                | 58                                              | 90.50    |

**Table S3:** Oligonucleotides used in this study

| <b>Name</b>        | <b>Sequence (5' to 3')</b>                   | <b>Application</b>                   |
|--------------------|----------------------------------------------|--------------------------------------|
| F10 S:D614G F      | TCTTTATCAGGGTGTTAACTGCAC                     | Mutagenesis PCR                      |
| F10 S:D614G R      | ACAGCAACCTGGTTAGAAGTATTTG                    | Mutagenesis PCR                      |
| F9 S:E484Q F       | CCTTGTAATGGTGTTC AAGGTT                      | Mutagenesis PCR                      |
| F9 S:E484A F       | CCTTGTAATGGTGTTCAGGTTTTAATTG                 | Mutagenesis PCR                      |
| F9 S:E484K F       | CCTTGTAATGGTGTTCAGGGTTTTAATTG                | Mutagenesis PCR                      |
| F9 S:E484Q/A/K R   | TGTGCTACCGGCCTG                              | Mutagenesis PCR                      |
| F9 S:Q498R/N501Y F | GTTTCCGACCCACTTATGGTGTG                      | Mutagenesis PCR                      |
| TAR F10b F         | CCAACCATACAGAGTAGTAGTAC                      | TAR fragment                         |
| TAR F10 R          | TCATGTT CAGAAATAGGACTTGTTG                   | TAR fragment (48)                    |
| TAR F9 F           | GGAGTCACATTAATTGGAGAAGC                      | TAR fragment (48)                    |
| TAR F9 R           | GCATCAGTAGTGT CAGCAATGTC                     | TAR fragment (48)                    |
| sgRNA N F          | CGATCTCTTG TAGATCTGTTCTC                     | sgRNA N<br>quantification            |
| sgRNA N Prb        | FAM/ CAG TAA CCA GAA TGG AGA ACG<br>CAG /BHQ | sgRNA N<br>quantification            |
| sgRNA N R          | CAGTATTATTGGGTAAACCTTGG                      | sgRNA N<br>quantification            |
| 38F                | GAAGTCAGACAAATCGCTCCAG                       | RT-PCR amplicon<br>competition assay |
| 38R                | ACTAGCGCATATACCTGCACC                        | RT-PCR amplicon<br>competition assay |
